# Supplementary material for: Translational investigation of electrophysiology in hypertrophic cardiomyopathy
Source: PubMed Central journal article supplement — J Mol Cell Cardiol. 2021 Aug;157:77–89. doi: 10.1016/j.yjmcc.2021.04.009 (PMC8320769; doi:10.1016/j.yjmcc.2021.04.009), 2021-08
Supplement: mmc1.pdf [file mmc1.pdf]

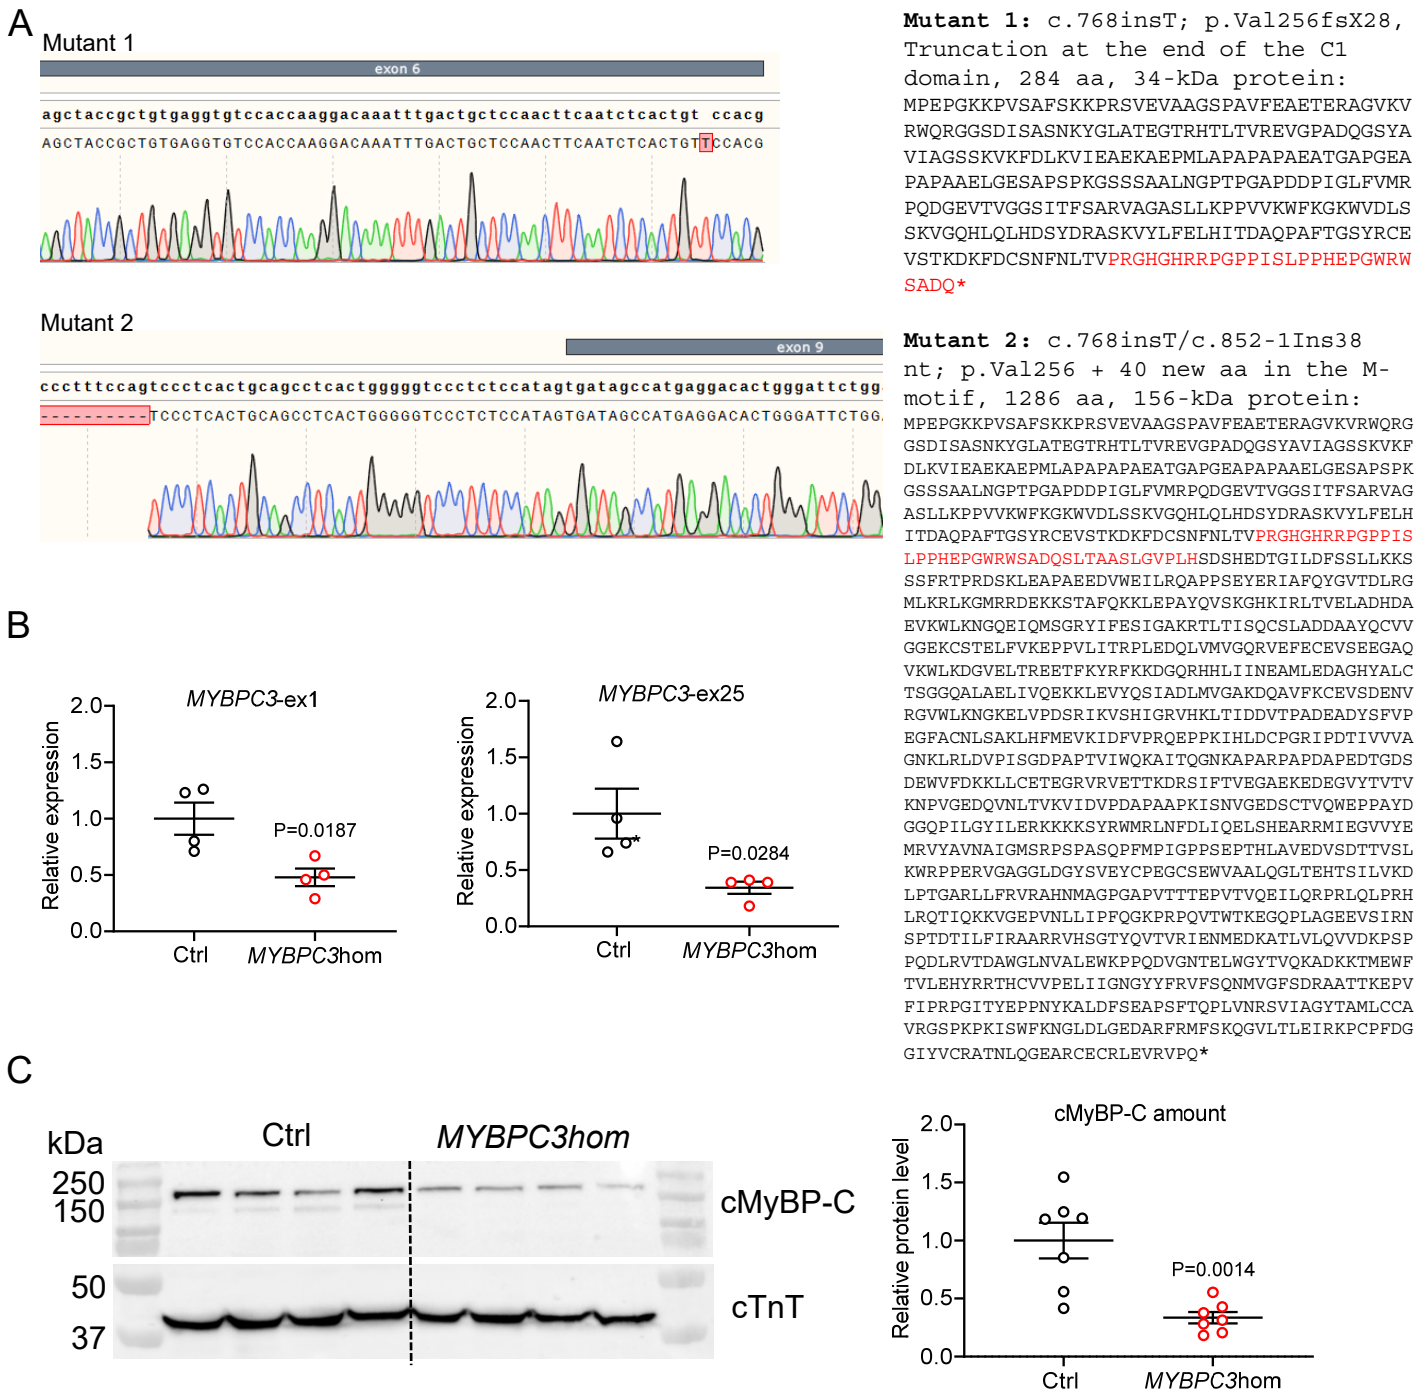

**Supplemental Fig. 1: Additional information on hiPSC-CM model MYBPC3hom.**

A, Sequencing of RT-PCR in *MYBPC3*hom EHTs. Source: SnapGene® screenshots. Top: T-insertion at the end of exon 6 of *MYBPC3*, which leads to a stop codon in exon 9 (=mutant 1). Bottom: additional intron retention (38 bp) at the end of intron 8, which, combined with the T-insertion, leads to the insertion of 40 new amino acids and restoration of the reading frame (=mutant 2). Right: protein consequence of both mutants. New amino acids are indicated in red.

B: RT-qPCR analysis of *MYBPC3* mRNA levels with primer pairs located around exon 1 (left) or exon 25 (right) and normalized to *TNNT2* (cardiac troponin T) in isogenic control and *MYBPC3*hom EHTs (n=4/group).

C: left, Western Blot stained for cardiac myosin-binding protein c (cMyBP-C) and cardiac troponin T (cTnT) of total protein extracts from control and *MYBPC3*hom EHTs. Separation is indicated by the dotted line. Right, Densitometric quantification of cMyBP-C level, normalized to cTnT loading signal and related to cMyBP-C average of isogenic controls, n=7/group).

Data are expressed as mean±SEM, with P values vs. Ctrl obtained with the unpaired Student's t-test.

Abbreviations: aa, amino acids; Ctrl, isogenic control; EHTs, engineered heart tissues; kDa, kilodalton; nt, nucleotides.

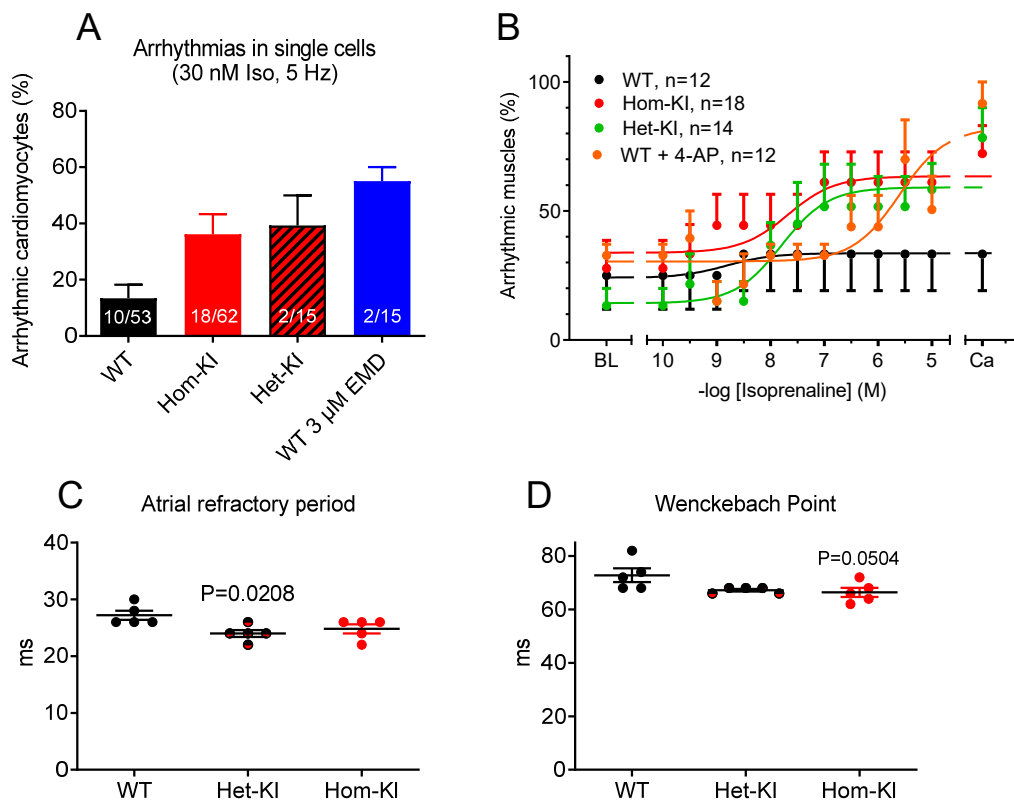

**Supplemental Fig. 2: Arrhythmia incidence in mouse ventricular cardiomyocytes and muscle strips, additional data from Langendorff-perfused hearts.**

A: Quantification of arrhythmically beating ventricular mouse cardiomyocytes stimulated with 30 nM isoprenaline at 5 Hz pacing rate (n-numbers (preparations/cells) indicated in bar graphs).

B: Quantification of arrhythmically beating ventricular muscle strips stimulated with cumulatively increased concentrations of isoprenaline at 2 Hz pacing rate (n-numbers (muscle strips) indicated in graph, 4 muscles per heart). 4-AP was administered at 1 mM.

C: Quantification of atrial refractory period times in Langendorff-perfused hearts (n=5-6). Stimulation protocol: S1: 12 x 100 ms, S2.

D: Quantification of Wenckebach point times in Langendorff-perfused hearts (n=5-6). Data are expressed as mean $\pm$ SEM, with P values vs WT in panels A, C and D obtained with the Kruskal-Wallis test, followed by Dunn's multiple comparison test. In panel B, F-test for maximal values indicated P=0.0470 between WT vs. Hom-KI and Het-KI, P=0.0053 between WT vs. Hom-KI, P=0.0291 between WT vs. Het-KI, and P=0.0586 between Hom-KI and WT 4-AP. F-test for EC50 of isoprenaline indicated P=0.0044 between WT 4-AP vs Hom-KI.

Abbreviations: 4-AP, 4-aminopyridine; EMD, EMD57033; Iso, isoprenaline; Het-KI, heterozygous *Mybpc3*-targeted knock-in; Hom-KI, homozygous *Mybpc3*-targeted knock-in; WT, wild-type.

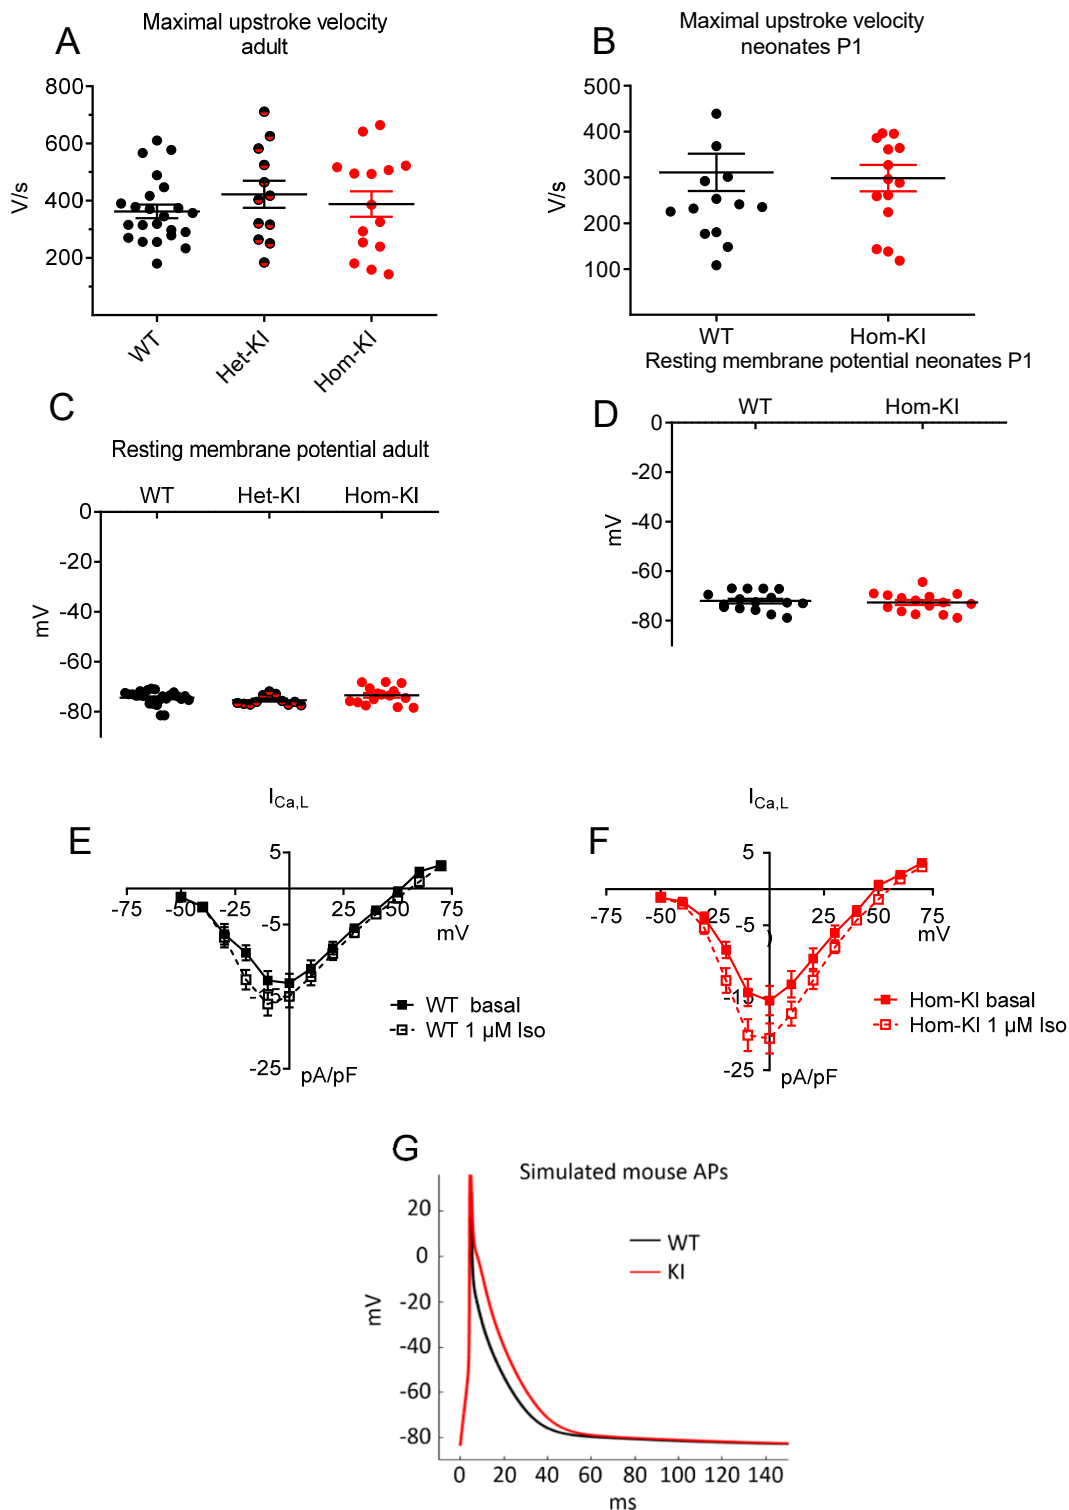

### Supplemental Fig. 3: Additional electrophysiological data.

A - D: Maximum upstroke velocities (A, B) and resting membrane potentials (C, D) of action potentials measured in subendocardial layers of the left ventricle of mouse hearts. n adult: WT=16, Het-KI=15, Hom-KI=12, n neonatal: WT=16, Hom-KI=15. Means $\pm$ SEM are shown.

E, F: L-Type  $Ca^{2+}$  currents ( $I_{Ca,L}$ ) measured in voltage-clamped adult ventricular mouse cardiomyocytes at different voltages (n=8/group).

G: Simulated ventricular mouse action potentials based on all electrophysiological parameters ( $K^+$ ,  $Ca^{2+}$  current measurements and  $Na^+$  current indirectly measured by upstroke velocity) obtained for this study.

Abbreviations: APs, action potentials; Iso, isoprenaline; Het-KI, heterozygous *Mybpc3*-targeted knock-in; Hom-KI, homozygous *Mybpc3*-targeted knock-in; WT, wild-type.

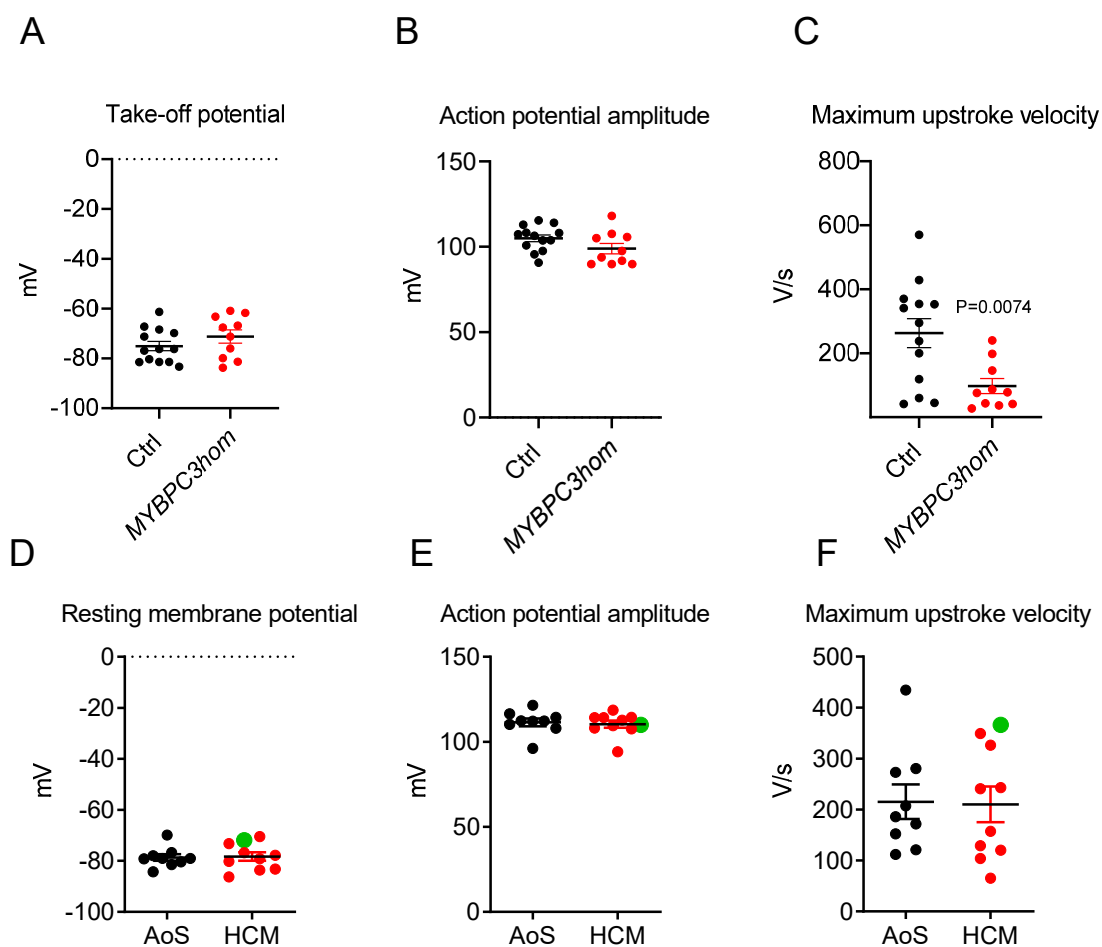

**Supplemental Fig. 4: Additional data from action potential measurements in human engineered heart tissue and septum specimen.**

Quantification of take-off / resting membrane potential, action potential amplitudes and maximum upstroke velocities of measured action potentials in EHTs (A-C, n=13 for Ctrl and 10 for *MYBPC3*hom) and septum specimen (D-F, n=9 for AoS, n=10 for HCM, including in green the *MYBPC3* mutation).

Data are expressed as mean±SEM. P value vs. Ctrl were obtained with the unpaired Student's t-test.

Abbreviations used: AoS, aortic stenosis; Ctrl, isogenic control; *MYBPC3*hom, homozygous *MYBPC3*.

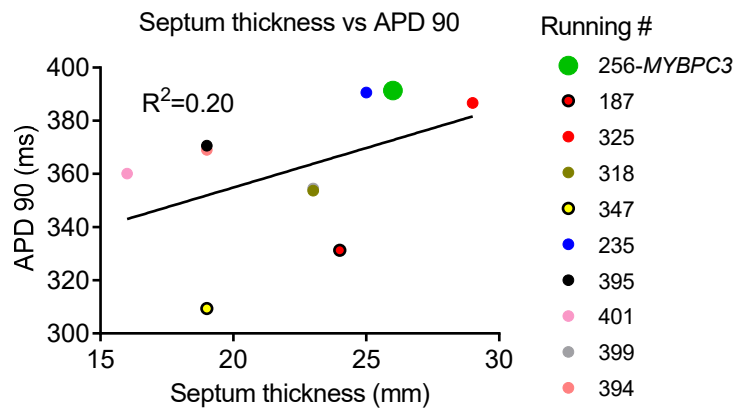

**Supplemental Fig. 5: Relation between septum thickness measured in echocardiography in patients and action potential duration at 90% repolarization measured in septal myectomies of the same patients *ex vivo*.**

Patient #256 with a *MYBPC3* mutation is indicated in green.

Abbreviation: APD, action potential duration.

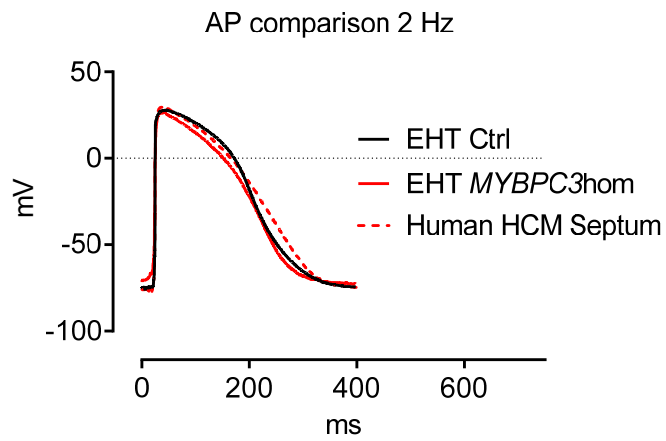

**Supplemental Fig. 6: Comparison of action potentials measured in human engineered heart tissue and septum specimen, paced at 2 Hz, recorded with the sharp microelectrode technique.**  
EHT Ctrl (isogenic control EHTs): n=13, *MYBPC3*hom: n=10, Human HCM septum: n=8

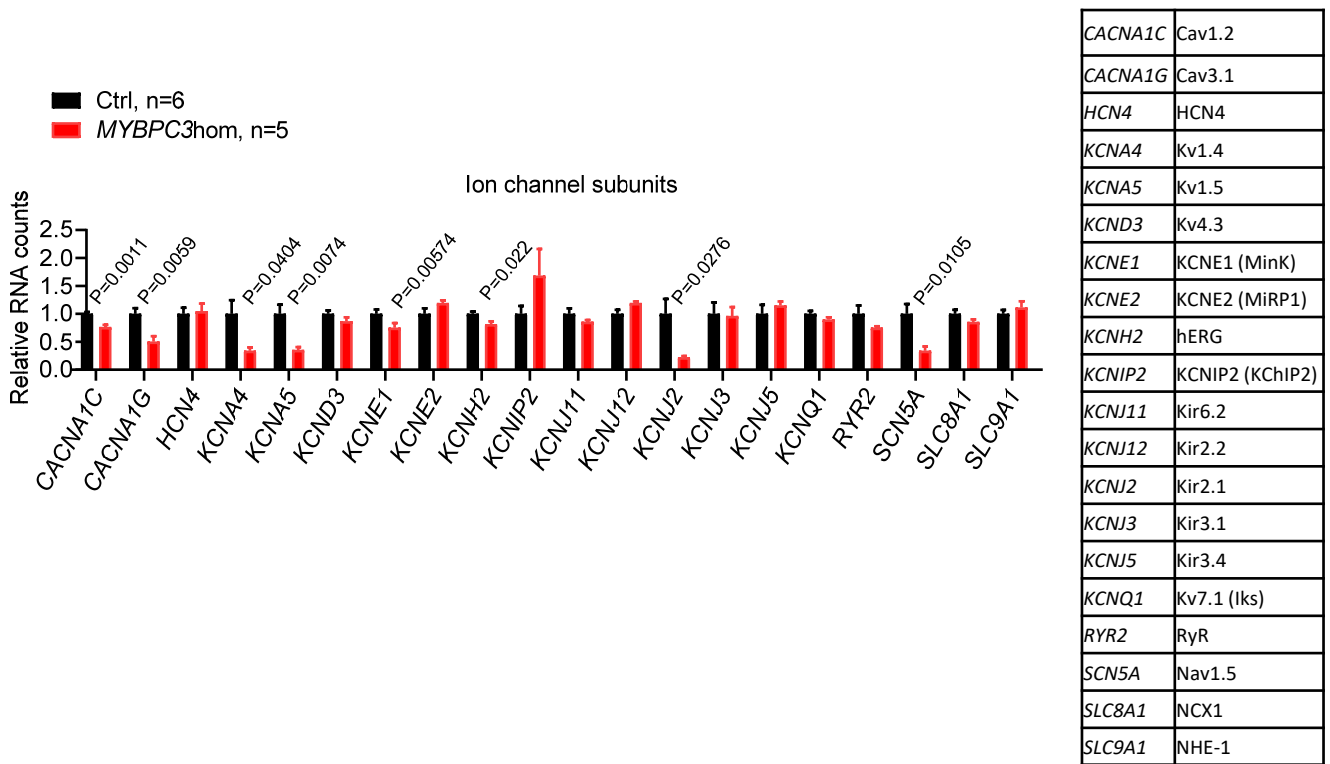

**Supplemental Fig. 7: Quantification of mRNAs of ion channel subunits in human engineered heart tissues.**

Data were obtained with a customized Nanostring panel.

Corresponding channels to genes are given as abbreviations in the inset table.

Data are expressed as mean±SEM, and P values vs. ctrl were obtained with the unpaired Student's t-test (n=6 in Ctrl and 5 in *MYBPC3*hom).

Abbreviations: Ctrl, isogenic control; *MYBPC3*hom, homozygous *MYBPC3* mutant.

| Running # | Septum thickness (mm) | LVOT gradient (mmHg) | Syncope | VTs | AF  | TNT (µg/l) | NT-proBNP (pg/ml) | Medication                            |
|-----------|-----------------------|----------------------|---------|-----|-----|------------|-------------------|---------------------------------------|
| 256       | 26                    | 110                  | no      | no  | no  | < 3        | 1517              | Verapamil, BB*                        |
| 187       | 24                    | 85                   | no      | yes | no  | 24         | 3386              | BB                                    |
| 325       | 29                    | 120                  | no      | no  | no  | 7          | 1667              | BB                                    |
| 318       | 23                    | 82                   | no      | no  | no  | 11         | 1519              | BB                                    |
| 347       | 19                    | 102                  | no      | no  | no  | 36         | 11269             | BB, Moxonidine, Phenprocoumon         |
| 235       | 25                    | 60                   | no      | yes | yes | 9          | 1811              | BB, ACE inhibitor, Torasemide, ASA    |
| 395       | 19                    | 133                  | no      | no  | no  | n.d.       | n.d.              | BB                                    |
| 401       | 16                    | 55                   | no      | no  | no  | 13         | n.d.              | BB, ACE inhibitor, ASA                |
| 399       | 23                    | 87                   | no      | no  | no  | 290        | 2425              | BB, Moxonidine, Diuretic, L-Thyroxine |
| 394       | 19                    | 64                   | no      | no  | no  | 12         | 1047              | BB, Diuretic, ASA, Moxonidine         |

**Supplemental Table 1: HCM patient data.**

Abbreviations: AF, atrial fibrillation; ASA, acetylsalicylic acid; BB, beta blocker, f, female; LVOT, left ventricular outflow tract; m, male; n.d., not determined; NT-proBNP, brain natriuretic peptide; QTc, frequency-corrected QT time; TNT, cardiac troponin T; VT, ventricular tachycardia; \*, patient also carried an implanted cardioverter-defibrillator.
